# Supplementary material
Source: PubMed Central journal article supplement (PMC2867317)
Supplement: supp_dev.046110_DEV046110tableS1.pdf [file supp_dev.046110_DEV046110tableS1.pdf]

**Table S1. Germ cell survival when *wun* and *wun2* maternal levels are altered**

| Genotype                                                               | Genotype (female × male)                             | Average germ cell number per stage 15/16 embryo |
|------------------------------------------------------------------------|------------------------------------------------------|-------------------------------------------------|
| wild type                                                              | + × +                                                | 20.8 (s.d.=3.0, n=19)                           |
| <i>wun2</i> M <sup>-</sup> Z <sup>+</sup>                              | <i>wun2</i> <sup>N14</sup> /Df(2R)w45-19g × +        | 2.3 (s.d.=3.9, n=29)                            |
| <i>wun2</i> M <sup>-</sup> Z <sup>+</sup>                              | <i>wun2</i> <sup>EP2650ex34</sup> /Df(2R)w45-19g × + | 10.3 (s.d.=6.3, n=24)                           |
| <i>wun2</i> M <sup>-</sup> Z <sup>+</sup>                              | <i>wun2</i> <sup>EP2208ex60</sup> /Df(2R)w45-19g × + | 9.3 (s.d.=5.2, n=23)                            |
| <i>wun2</i> M <sup>-</sup> Z <sup>+</sup>                              | GLC <i>wun2</i> <sup>EP2650ex34</sup> × +            | 11.1 (s.d.=3.5, n=25)                           |
| <i>wun2</i> M <sup>-</sup> Z <sup>+</sup>                              | GLC <i>wun2</i> <sup>N14</sup> × +                   | 1.0 (s.d.=1.3, n=21)                            |
| <i>wun wun2</i> M <sup>-</sup> Z <sup>+</sup> UAS <i>lacZ</i>          | GLC <i>wun wun2</i> ; <i>nosGAL4</i> /+ × UAS        | 4.1 (s.d.=3.2, n=35)                            |
| <i>wun wun2</i> M <sup>-</sup> Z <sup>+</sup> UAS <i>wun</i>           | GLC <i>wun wun2</i> ; <i>nosGAL4</i> /+ × UAS        | 26.2 (s.d.=5.0, n=21)                           |
| <i>wun wun2</i> M <sup>-</sup> Z <sup>+</sup> UAS <i>wun2myc</i>       | GLC <i>wun wun2</i> ; <i>nosGAL4</i> /+ × UAS        | 25.7 (s.d.=7.8, n=20)                           |
| <i>wun wun2</i> M <sup>-</sup> Z <sup>+</sup> UAS <i>wun2myc</i> H326K | GLC <i>wun wun2</i> ; <i>nosGAL4</i> /+ × UAS        | 4.4 (s.d.=3.9, n=28)                            |

GLC *wun wun2* indicates *wun*<sup>49</sup> *wun2*<sup>EP2650ex34</sup> germline clone females. *Df(2R)w45-19g* is a deficiency that removes both *wun* and *wun2*. Oregon R or *white* were used as wild-type strains (+). *wun2myc* H326K is a phosphatase dead-form of Wun2. *wun2*<sup>EP2650ex34</sup> and *wun2*<sup>EP2208ex60</sup> are P-element-induced deletions, whereas *wun2*<sup>N14</sup> is an EMS allele. *n*, total embryos scored; s.d., standard deviation.
